# Supplementary material
Source: PubMed Central journal article supplement (PMC3138699)

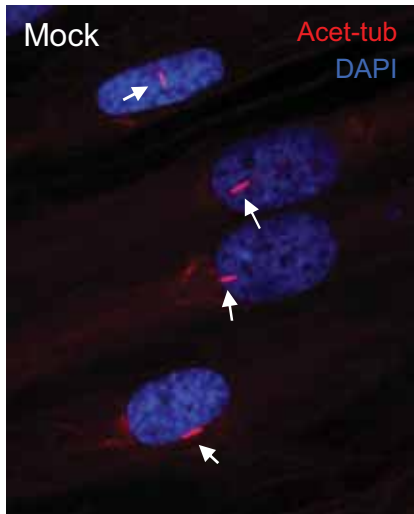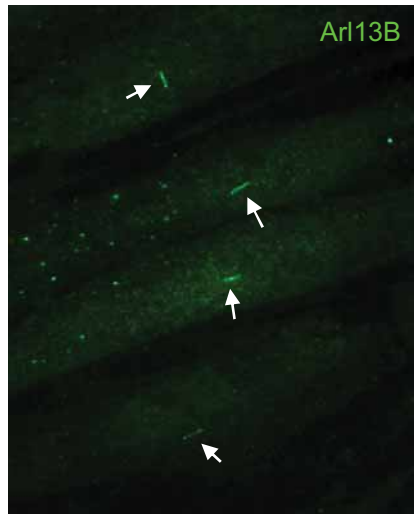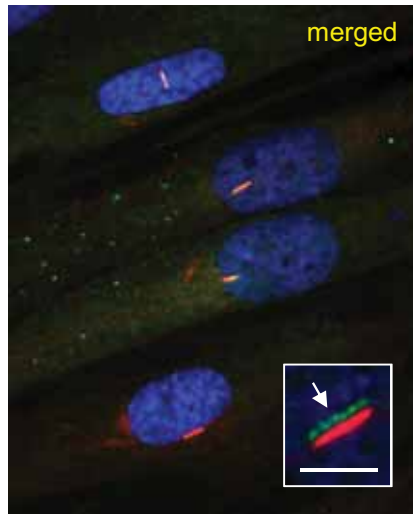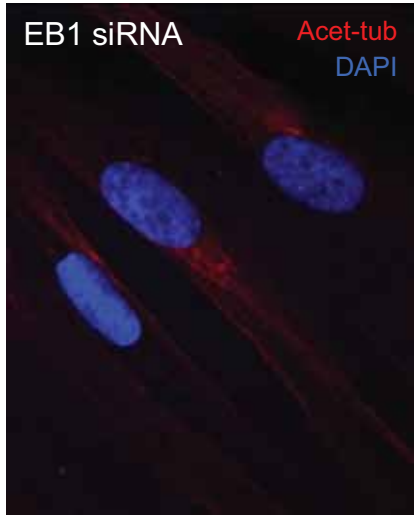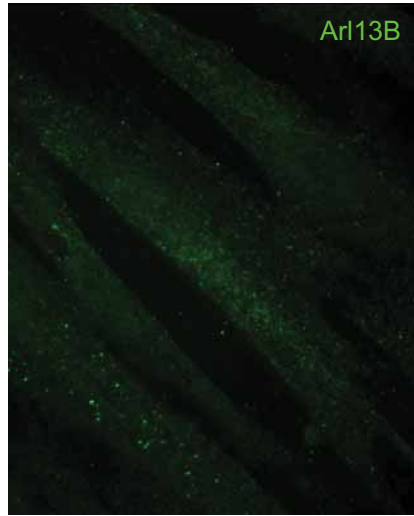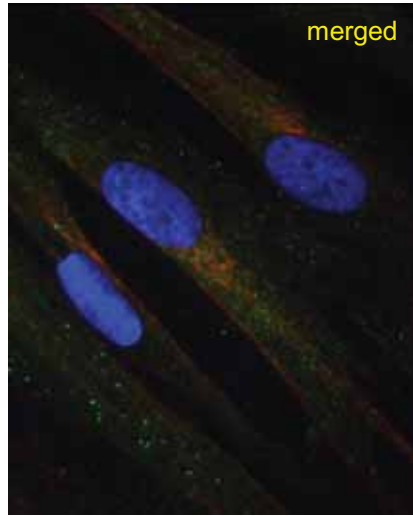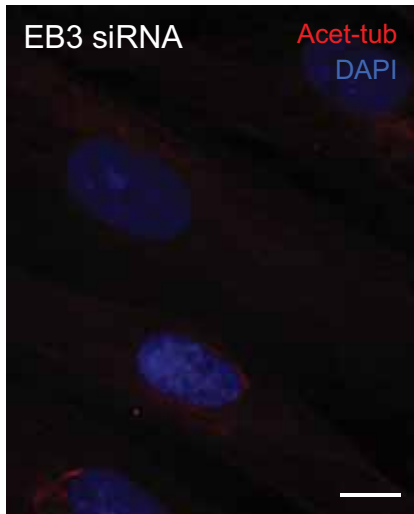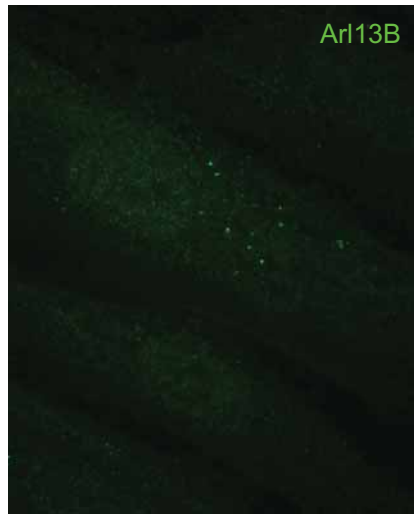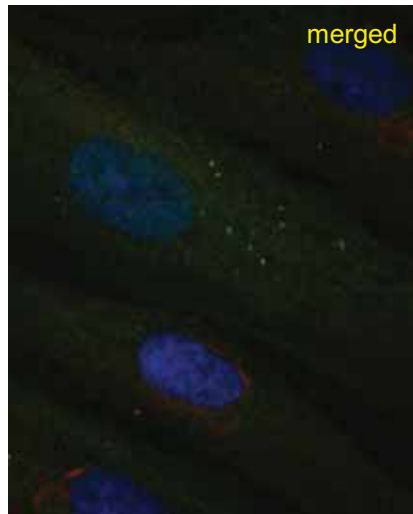

Supplement: supp_124.15.2539_JCS085852FigS1.pdf [file supp_124.15.2539_JCS085852FigS1.pdf]

A

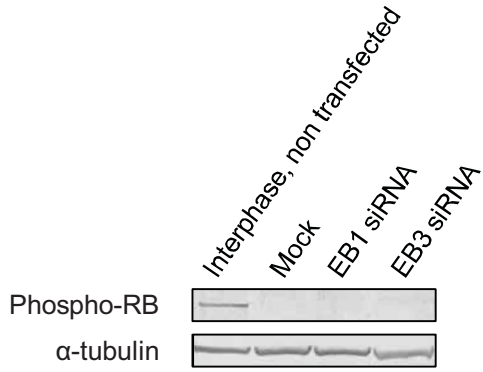

C

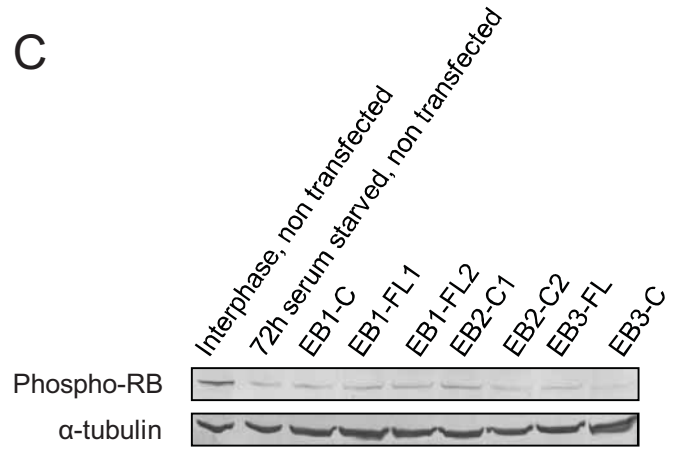

B

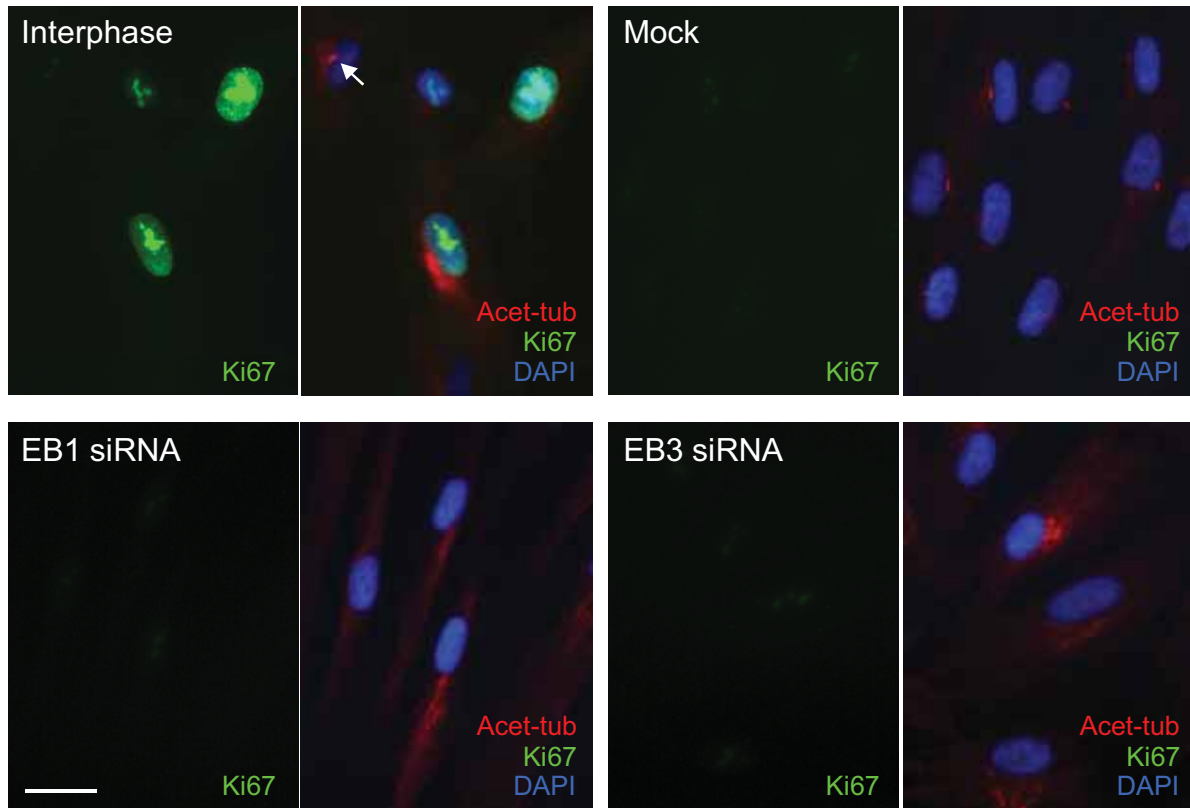

Supplement: supp_124.15.2539_JCS085852FigS2.pdf [file supp_124.15.2539_JCS085852FigS2.pdf]

**A**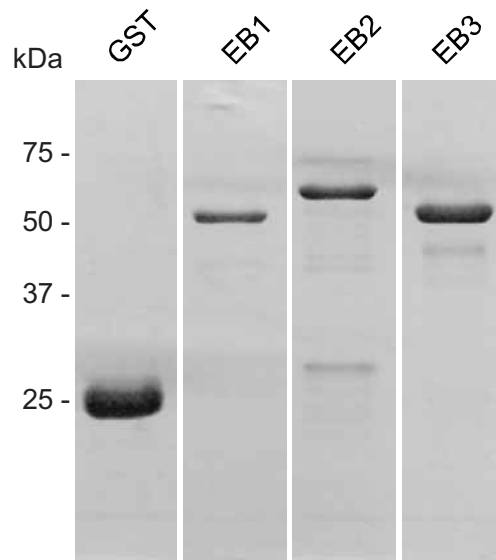**B**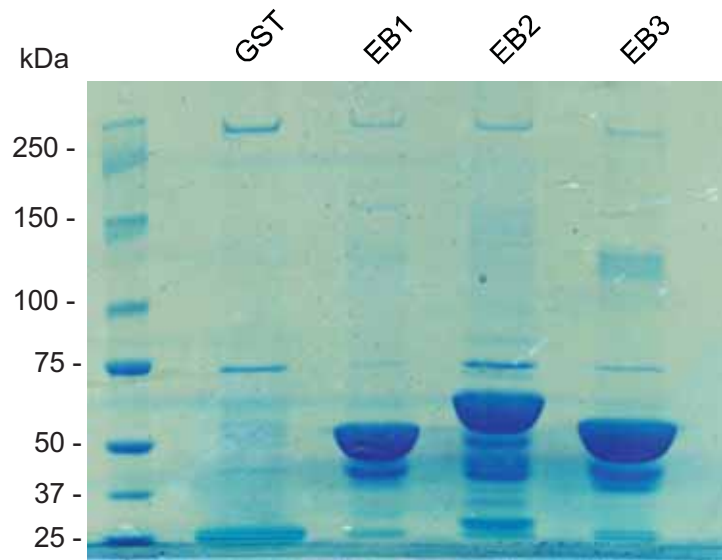**C**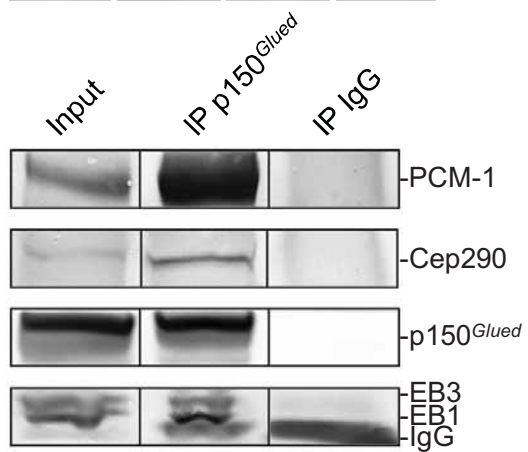

Supplement: supp_124.15.2539_JCS085852FigS4.pdf [file supp_124.15.2539_JCS085852FigS4.pdf]

A

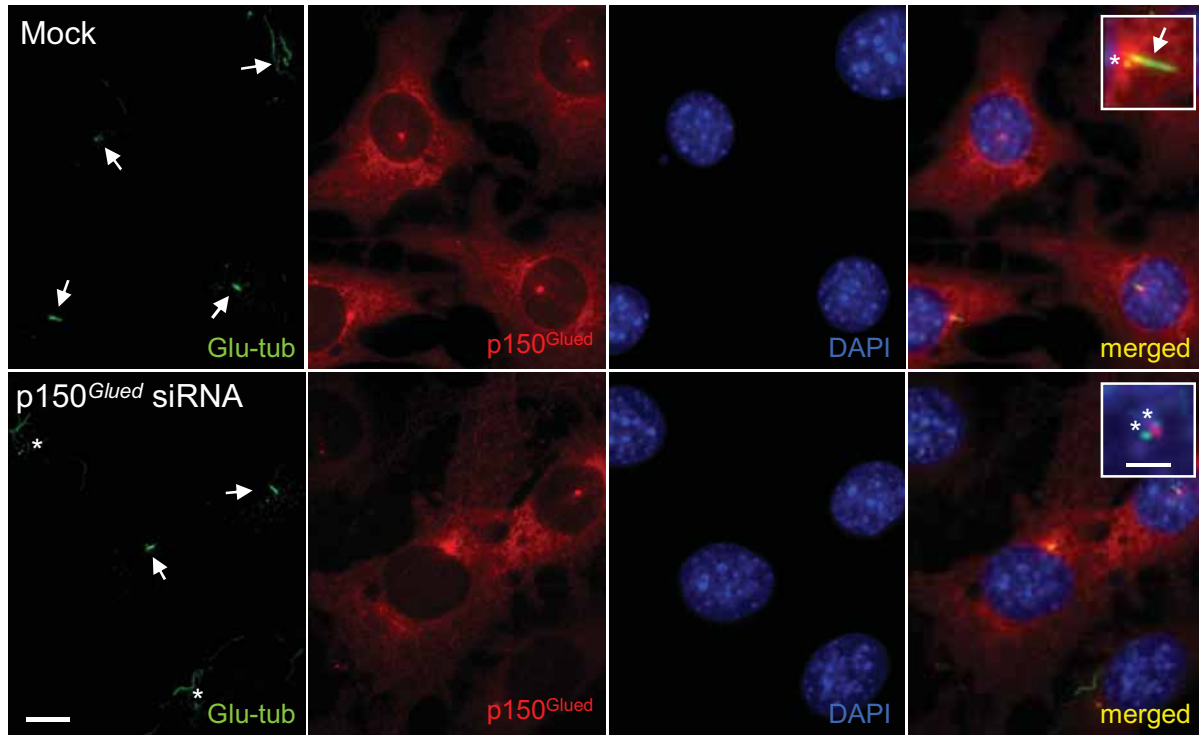

B

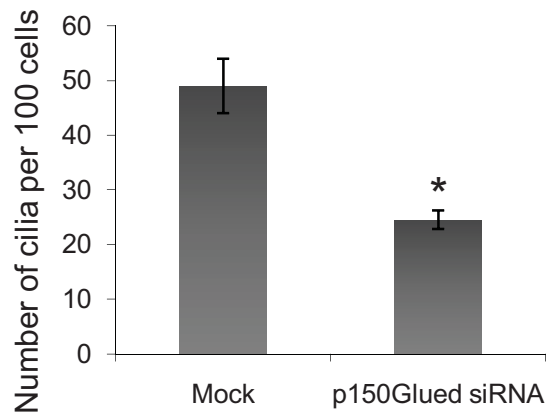

C

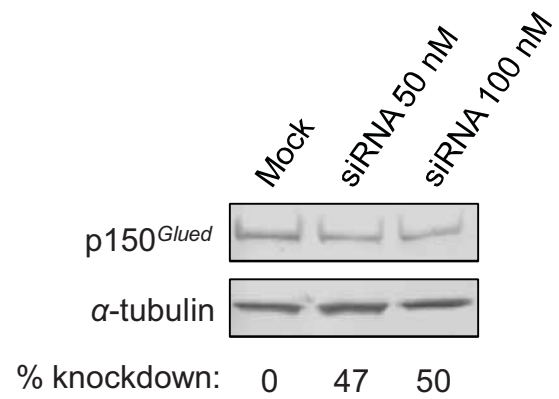

Supplement: supp_124.15.2539_JCS085852FigS5.pdf [file supp_124.15.2539_JCS085852FigS5.pdf]
